# Supplementary material for: Continuous Lumbar Plexus Block vs Continuous Lumbar Erector Spinae Plane Block for Postoperative Pain Control After Revision Total Hip Arthroplasty
Source: PubMed Central journal article supplement — Arthroplast Today. 2021 Apr 27;9:29–34. doi: 10.1016/j.artd.2021.03.016 (PMC8099915; doi:10.1016/j.artd.2021.03.016), 2021-04-27
Supplement: mmc2.pdf [file mmc2.pdf]

# INDIVIDUAL CONFLICT OF INTEREST STATEMENT

## *American Association of Hip and Knee Surgeons*

(Adopted from the American Academy of Orthopaedic Surgeons disclosure statement)

The following form **must be filled out completely and submitted by each author (example, 6 authors, 6 forms).** **All items require a response. If there is no relevant disclosure for a given item, enter "None."**

---

**Manuscript Title** Continuous lumbar plexus block versus continuous lumbar erector spinae plane block for postoperative pain control after revision total hip arthroplasty

1. Royalties from a company or supplier (The following conflicts were disclosed) None
  
2. Speakers bureau/paid presentations for a company or supplier (The following conflicts were disclosed) None
  
- 3A. Paid employee for a company or supplier (The following conflicts were disclosed) None
  
- 3B. Paid consultant for a company or supplier (The following conflicts were disclosed) None
  
- 3C. Unpaid consultants for a company or supplier (The following conflicts were disclosed) None
  
4. Stock or stock options in a company or supplier (The following conflicts were disclosed) None
  
5. Research support from a company or supplier as a Principal Investigator (The following conflicts were disclosed)  
None
  
6. Other financial or material support from a company or supplier (The following conflicts were disclosed) None
  
7. Royalties, financial or material support from publishers (The following conflicts were disclosed) None
  
8. Medical/Orthopaedic publications editorial/governing board (The following conflicts were disclosed) None
  
9. Board member/committee appointments for a society (The following conflicts were disclosed) None

**Each author must sign AND print or type his/her name, date and submit a separate form**

In addition, one BLINDED Conflict of Interest form (no author names used) should be submitted per manuscript with all author disclosures.

---

Amy Chen

Author Name (Print or Type)

*Amy Chen*

Author Signature

6/7/20

Date
